# Supplementary material for: High-throughput microcircuit analysis of individual human brains through next-generation multineuron patch-clamp
Source: eLife. 2019 Nov 19;8:e48178. doi: 10.7554/eLife.48178 (PMC6894931; doi:10.7554/eLife.48178)
Supplement: Figure 3—source data 1. [file elife-48178-fig3-data1.xlsx]

## Sheet: Tabelle1
Rat neurons (Figure 3 I-L)
Different cells recorded with fresh pipette and twice with the same cleaned pipette	sample size			mean ± standard deviation			relative difference
	fresh pipette	1x cleaned	2x cleaned	fresh pipette	1x cleaned	2x cleaned	mean [90% confidence interval]		p-value
Resting membrane potential (mV)	25	21	21	-72.4 ± 5	-72.7 ± 4.7	-72.4 ± 4.7	0% [4% -3%]	0% [3% -3%]	0.153337
Input resistance (MΩ)	25	21	21	81.3 ± 20.1	84.5 ± 13.4	83.6 ± 19.3	4% [-6% 14%]	3% [-9% 15%]	0.637223
Access resistance (MΩ)	25	21	21	21.8 ± 7.9	23.8 ± 7.9	23.6 ± 7.4	9% [-9% 27%]	8% [-9% 25%]	0.345547
AP threshold (mV)	25	21	21	-42.9 ± 5.1	-42.9 ± 3.6	-43.6 ± 3.5	0% [5% -5%]	2% [7% -3%]	0.779906
AP amplitude (mV)	25	21	21	85.3 ± 7.9	82.6 ± 8.2	82.6 ± 5.2	-3% [-8% 1%]	-3% [-7% 1%]	0.509807
AP half-width (ms)	25	21	21	0.98 ± 0.23	0.98 ± 0.17	0.98 ± 0.28	0% [-10% 10%]	1% [-12% 13%]	0.274239
AP max. depolarisation rate (mV/ms)	25	21	21	400 ± 102	379 ± 99	370 ± 83	-5% [-18% 7%]	-8% [-19% 4%]	0.830332
AP max. repolarisation rate (mV/ms)	25	21	21	-80.1 ± 19.8	-79.1 ± 20.1	-78.3 ± 16.3	-1% [11% -13%]	-2% [9% -13%]	0.872029
Spontaneous EPSP frequency (Hz)	23	21	21	16.6 ± 7.4	17.6 ± 3.6	15.8 ± 4.5	6% [-12% 24%]	-5% [-24% 13%]	0.848099
Spntaneous EPSP amplitude (mV)	23	21	21	0.3 ± 0.09	0.32 ± 0.13	0.31 ± 0.11	5% [-13% 22%]	3% [-13% 19%]	0.705724
Human neurons (Figure 3-supplement figures 1-4)
Different cells recorded with fresh pipette and cleaned pipette (supplement figure 1)	sample size			mean ± standard deviation			relative difference
	fresh pipette	cleaned pipette		fresh pipette	cleaned pipette		mean [90% confidence interval]		p-value
Resting membrane potential (mV)	24	9		-75.6 ± 10.2	-70.6 ± 10.8		-7% [15% -2%]		0.249303
Input resistance (MΩ)	24	9		84.2 ± 27.5	77.7 ± 14.6		-8% [-11% 27%]		0.824061
Access resistance (MΩ)	24	9		19.9 ± 8.7	22.3 ± 11.1		12% [-42% 18%]		0.642032
AP threshold (mV)	24	9		-44.1 ± 6.9	-42.5 ± 4.2		-4% [13% -5%]		0.55779
AP amplitude (mV)	24	9		87.1 ± 8.2	83.8 ± 9.3		-4% [-3% 10%]		0.302646
AP half-width (ms)	24	9		1.03 ± 0.21	1.07 ± 0.12		4% [-16% 8%]		0.761761
AP max. depolarisation rate (mV/ms)	24	9		324 ± 69	283 ± 57		-13% [0% 26%]		0.110334
AP max. repolarisation rate (mV/ms)	24	9		-75.9 ± 16.5	-69.8 ± 6.8		-8% [20% -4%]		0.55779
Same cells recorded with fresh pipette and repatched with same cleaned pipette (supplement figure 2)
	sample size			mean ± standard deviation			relative difference
	fresh pipette	clean & repatch		before repatch	clean & repatch		mean [90% confidence interval]		p-value
Resting membrane potential (mV)	9	9		-76.8 ± 4.4	-75.9 ± 8.2		-1% [8% -6%]		0.496094
Input resistance (MΩ)	9	9		83.2 ± 38.1	62.3 ± 20.2		-25% [-3% 54%]		0.0078125
Access resistance (MΩ)	9	9		25.9 ± 14.1	20.6 ± 6.4		-20% [-12% 53%]		0.359375
AP threshold (mV)	9	9		-42.5 ± 5.7	-43.4 ± 8.3		2% [11% -15%]		1
AP amplitude (mV)	9	9		84 ± 8.1	78.1 ± 7.9		-7% [0% 14%]		0.0976562
AP half-width (ms)	9	9		0.99 ± 0.19	0.98 ± 0.13		-1% [-11% 14%]		0.570312
AP max. depolarisation rate (mV/ms)	9	9		321 ± 72	277 ± 63		-14% [-3% 30%]		0.203125
AP max. repolarisation rate (mV/ms)	9	9		-79.2 ± 15.6	-72.8 ± 8.8		-8% [20% -4%]		0.25
Same cells recorded with fresh pipette and repatched with another fresh pipette (supplement figure 3)
	sample size			mean ± standard deviation			relative difference
	fresh pipette	fresh repatch		before repatch	fresh repatch		mean [90% confidence interval]		p-value
Resting membrane potential (mV)	5	5		-75.6 ± 10.2	-70.6 ± 10.8		-2% [13% -8%]		0.625
Input resistance (MΩ)	5	5		84.2 ± 27.5	77.7 ± 14.6		-7% [-14% 28%]		0.8125
Access resistance (MΩ)	5	5		19.9 ± 8.7	22.3 ± 11.1		12% [-60% 37%]		0.625
AP threshold (mV)	5	5		-44.1 ± 6.9	-42.5 ± 4.2		3% [17% -23%]		1
AP amplitude (mV)	5	5		87.1 ± 8.2	83.8 ± 9.3		-3% [-6% 11%]		0.625
AP half-width (ms)	5	5		1.03 ± 0.21	1.07 ± 0.12		7% [-20% 5%]		0.3125
AP max. depolarisation rate (mV/ms)	5	5		324 ± 69	283 ± 57		-12% [-9% 32%]		0.4375
AP max. repolarisation rate (mV/ms)	5	5		-75.9 ± 16.5	-69.8 ± 6.8		-8% [22% -5%]		0.4375
Same neurons recorded in fresh ACSF and in ACSF after cleaning (supplement figure 3)	sample size			mean ± standard deviation			relative difference
	fresh ACSF	after clean		fresh ACSF	ACSF after clean		mean [90% confidence interval]		p-value
Resting membrane potential (mV)	19	19		-72.6 ± 4	-73.8 ± 6.7		2% [2% -6%]		0.184181
Input resistance (MΩ)	19	19		62.5 ± 16.9	77 ± 26.3		23% [-42% -4%]		< 0.001
Access resistance (MΩ)	19	19		21.8 ± 10.4	26.9 ± 21.4		24% [-65% 18%]		0.259835
AP threshold (mV)	19	19		-41.4 ± 4.9	-40.5 ± 9		-2% [12% -7%]		0.573169
AP amplitude (mV)	19	19		78.9 ± 9.1	77.7 ± 9.1		-2% [-5% 8%]		0.197833
AP half-width (ms)	19	19		0.83 ± 0.15	0.83 ± 0.16		-1% [-9% 11%]		0.896039
AP max. depolarisation rate (mV/ms)	19	19		318 ± 80	312 ± 78		-2% [-11% 15%]		0.295424
AP max. repolarisation rate (mV/ms)	19	19		-93.4 ± 16	-93.2 ± 19		0% [10% -10%]		0.546088
