# Supplementary material for: High-throughput microcircuit analysis of individual human brains through next-generation multineuron patch-clamp
Source: eLife. 2019 Nov 19;8:e48178. doi: 10.7554/eLife.48178 (PMC6894931; doi:10.7554/eLife.48178)
Supplement: Figure 3—source data 2. [file elife-48178-fig3-data2.xlsx]

## Sheet: Tabelle1
	Mean synaptic amplitude (mV)		Mean relative change	p-Value (Mann-Whitney U)
Synapse pair	Fresh ACSF	ACSF after cleaning
1	0.883092	1.08554	1.22925	0.0565165
2	0.984484	1.23929	1.25882	6.61045e-05
3	0.334147	0.281536	0.842553	0.0498637
4	1.52325	1.4689	0.964319	0.524987
5	0.395369	0.344284	0.870792	0.101697
6	0.1592	0.119263	0.749137	0.133283
7	1.49904	1.37056	0.914292	0.140401
