# Supplementary material for: High-throughput microcircuit analysis of individual human brains through next-generation multineuron patch-clamp
Source: eLife. 2019 Nov 19;8:e48178. doi: 10.7554/eLife.48178 (PMC6894931; doi:10.7554/eLife.48178)
Supplement: Figure 4—source data 1. [file elife-48178-fig4-data1.xlsx]

## Sheet: experimental times
manipulator	region	sliceID	pipette mounting (in min)	pipette positioning (in min)	cell patching (in min)	total time (in min)
8	rat presubiculum	170403S3	11	9	14	34
8	rat presubiculum	170510S3	10	9	15	34
8	rat presubiculum	170503S3	13	4	18	35
8	rat presubiculum	170413S4	15	6	15	36
8	rat presubiculum	170503S2	16	3	17	36
8	rat presubiculum	170329S1	15	8	14	37
8	rat M1	170612S3	15	4	18	37
8	rat presubiculum	170403S4	9	12	17	38
8	rat M1	170612S2	10	9	23	42
10	rat M1	181213S2	7	9	22	38
10	rat M1	181214S2	10	7	26	43
10	rat M1	181214S1	9	9	26	44
10	rat M1	181220S1	8	11	25	44
10	rat M1	181220S2	11	10	23	44
10	rat M1	181219S1	8	11	29	48
10	rat M1	181213S1	15	9	25	49
10	rat M1	181204S1	18	5	28	51
10	rat M1	181206S1	15	11	28	54
