# Supplementary material for: High-throughput microcircuit analysis of individual human brains through next-generation multineuron patch-clamp
Source: eLife. 2019 Nov 19;8:e48178. doi: 10.7554/eLife.48178 (PMC6894931; doi:10.7554/eLife.48178)
Supplement: Figure 5—source data 1. [file elife-48178-fig5-data1.xlsx]

## Sheet: success rates
manipulator	tissue	slice_ID	patched_no_clean	patched_after_clean
6	mouse subiculum	41416S1	4
6	mouse subiculum	41416S2	5
6	mouse subiculum	41416S3	5
6	mouse subiculum	41416S4	6
6	mouse subiculum	41421S1	5
6	mouse subiculum	41421S2	6
6	mouse subiculum	41421S3	6
6	mouse subiculum	41421S4	6
6	mouse subiculum	41421S5	5
6	mouse subiculum	41421S6	6
6	mouse subiculum	41425S1	5
6	mouse subiculum	41425S2	6
6	mouse subiculum	41425S3	6
6	mouse subiculum	41425S4	5
6	mouse subiculum	41432S1	5
6	mouse subiculum	41432S2	4
6	mouse subiculum	41432S3	3
6	mouse subiculum	41432S4	6
6	mouse subiculum	41432S1.2	5
6	mouse subiculum	41432S2.2	5
6	mouse subiculum	41435S1	5
6	mouse subiculum	41435S2.2	6
6	mouse subiculum	41435S3	5
6	mouse subiculum	41435S4	5
6	mouse subiculum	41435S2	5
6	mouse subiculum	41437S1	5
6	mouse subiculum	41437S2	6
6	mouse subiculum	41437S3	6
6	mouse subiculum	41437S2.2	6
6	mouse subiculum	41442S1	6
8	rat presubiculum	140901S1	7
8	rat presubiculum	140901S2	7
8	rat presubiculum	140901S3	8
8	rat presubiculum	140903S1	7
8	rat presubiculum	140903S2	6
8	rat presubiculum	140903S3	6
8	rat presubiculum	140903S4	6
8	rat presubiculum	140909S1	7
8	rat presubiculum	140909S2	7
8	rat presubiculum	140909S3	8
8	rat presubiculum	140909S4	5
8	rat presubiculum	140911S1	5
8	rat presubiculum	140911S2	6
8	rat presubiculum	140911S3	6
8	rat presubiculum	140911S4	8
8	rat presubiculum	140911S5	8
8	rat presubiculum	140912S1	8
8	rat presubiculum	140912S2	8
8	rat presubiculum	140912S3	6
8	rat presubiculum	140912S4	6
8	rat presubiculum	140924S1	7
8	rat presubiculum	140924S2	8
8	rat presubiculum	140924S3	6
8	rat presubiculum	140924S4	5
8	rat presubiculum	140925S1	5
8	rat presubiculum	140925S2	8
8	rat presubiculum	140925S3	6
8	rat presubiculum	140925S4	7
8	rat presubiculum	140926S1	7
8	rat presubiculum	140926S2	8
8	rat presubiculum	140926S3	7
8	rat presubiculum	140926S4	8
8	rat presubiculum	140926S5	8
8	rat presubiculum	170818S1		8
8	rat presubiculum	170818S2		8
8	rat presubiculum	170821S1		8
8	rat presubiculum	170821S2		7
8	rat presubiculum	170822S1		8
8	rat presubiculum	170822S2		8
8	rat presubiculum	170822S3		8
8	rat presubiculum	170823S1		8
8	rat presubiculum	170823S2		8
8	rat presubiculum	170823S3		7
8	rat presubiculum	170825S1		8
8	rat presubiculum	170825S2		7
8	rat presubiculum	170825S3		8
8	rat presubiculum	170830S1		7
8	rat presubiculum	170830S2		8
8	rat presubiculum	170830S3		8
10	rat M1	190122S1	8	10
10	rat M1	190122S2	7	10
10	rat M1	190122S3	6	9
10	rat M1	190122S4	8	9
10	rat M1	190123S1	7	9
10	rat M1	190123S2	7	8
10	rat M1	190123S3	9	9
10	rat M1	190124S1	9	9
10	rat M1	190124S2	8	10
10	rat M1	190125S1	10	10
