# Supplementary material for: High-throughput microcircuit analysis of individual human brains through next-generation multineuron patch-clamp
Source: eLife. 2019 Nov 19;8:e48178. doi: 10.7554/eLife.48178 (PMC6894931; doi:10.7554/eLife.48178)
Supplement: Figure 5—source data 2. [file elife-48178-fig5-data2.xlsx]

## Sheet: connections tested
manipulator	tissue	animal	slice_ID	connections_tested_no_clean	connections_tested_after_clean
8	rat presubiculum	1	170818S1	56	58
8	rat presubiculum	1	170818S2	56	100
8	rat presubiculum	2	170821S1	56	30
8	rat presubiculum	2	170821S2	42	12
8	rat presubiculum	3	170822S1	56	26
8	rat presubiculum	3	170822S2	56	44
8	rat presubiculum	3	170822S3	56	28
8	rat presubiculum	4	170823S1	56	64
8	rat presubiculum	4	170823S2	56	68
8	rat presubiculum	4	170823S3	42
8	rat presubiculum	5	170825S1	56	72
8	rat presubiculum	5	170825S2	42	50
8	rat presubiculum	5	170825S3	56	26
8	rat presubiculum	6	170830S1	42
8	rat presubiculum	6	170830S2	56	36
8	rat presubiculum	6	170830S3	56	10
