# Supplementary material for: High-throughput microcircuit analysis of individual human brains through next-generation multineuron patch-clamp
Source: eLife. 2019 Nov 19;8:e48178. doi: 10.7554/eLife.48178 (PMC6894931; doi:10.7554/eLife.48178)
Supplement: Figure 6—source data 1. — Rich media files. [file elife-48178-fig6-data1.xlsx]

## Sheet: Tabelle1
manipulator	tissue	slice_ID	n_PC	n_IN	found_PP	tested_PP	found_total	tested_total	PP_probability
6	human temporal cortex	exp2_patient1_s1	3	1	0	6	2	12
6	human temporal cortex	exp2_patient1_s2	5	0	4	20	4	20
6	human temporal cortex	exp2_patient1_s3	6	0	6	30	6	30
8	human temporal cortex	exp1_patient1_s1	7	0	5	42	5	42
8	human temporal cortex	exp1_patient1_s1.2	6	0	11	30	11	30
8	human temporal cortex	exp1_patient1_s2	4	3	1	12	5	30
8	human temporal cortex	exp1_patient1_s4	10	2	11	66	14	104
8	human temporal cortex	exp1_patient1_s5	7	2	6	42	16	68
		sum	48	8	44	248	63	336	0.177419
8	human temporal cortex	exp1_patient2_s1	8	2	7	46	7	70
8	human temporal cortex	exp1_patient2_s2	5	3	1	12	4	42
8	human temporal cortex	exp1_patient2_s3	6	3	7	30	23	66
8	human temporal cortex	exp1_patient2_s4	8	0	0	56	0	56
8	human temporal cortex	exp1_patient2_s5	8	0	3	56	3	56
8	human temporal cortex	exp2_patient2_s1	7	0	3	42	3	42
8	human temporal cortex	exp2_patient2_s2	9	0	6	55	6	55
8	human temporal cortex	exp2_patient2_s3	8	0	8	56	8	56
10	human temporal cortex	exp3_patient2_s1	5	1	1	20	7	30
10	human temporal cortex	exp3_patient2_s2	10	0	22	90	22	90
10	human temporal cortex	exp3_patient2_s3	8	0	16	56	16	56
10	human temporal cortex	exp3_patient2_s4	8	0	0	56	0	56
		sum	90	9	74	575	99	675	0.128696
8	human temporal cortex	exp1_patient3_s1	8	0	10	52	10	52
8	human temporal cortex	exp1_patient3_s2	8	1	8	56	15	70
8	human temporal cortex	exp1_patient3_s3	13	1	12	76	14	86
8	human temporal cortex	exp1_patient3_s4	11	0	12	80	12	80
10	human temporal cortex	exp2_patient3_s1	7	0	5	42	5	42
10	human temporal cortex	exp2_patient3_s2	10	0	10	90	10	90
10	human temporal cortex	exp3_patient3_s1	7	1	6	42	12	56
10	human temporal cortex	exp3_patient3_s2	8	0	9	56	9	56
10	human temporal cortex	exp3_patient3_s3	9	0	10	72	10	72
10	human temporal cortex	exp3_patient3_s4	10	0	14	90	14	90
		sum	91	3	96	656	111	694	0.146341
